# Supplementary material
Source: Springer Nature journal article supplement (https://www.springermedizin.de/resource/supplementary/12958_2014_1234_MOESM6_ESM.pdf/9567118)

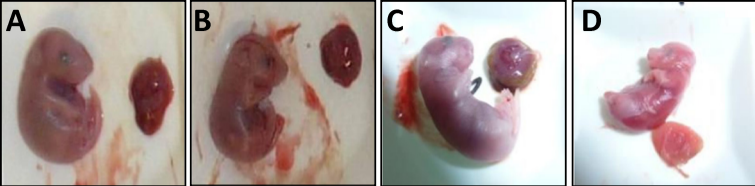

**E**

|    | Abnormal placentas (%) |      |
|----|------------------------|------|
|    | Ctrl                   | Test |
| P1 | 4                      | 13   |
| P2 | 0                      | 57   |
| P3 | 16                     | 58   |

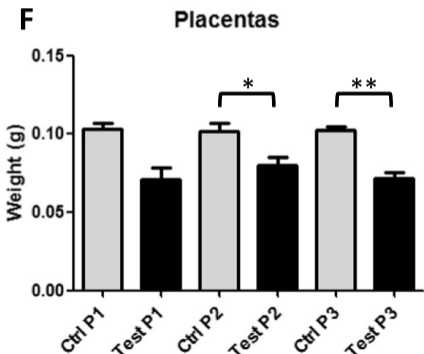

Supplement: MOESM6 [file 9567118]
